# Supplementary material for: Fine-tuning of thermally induced SCO behaviors of trinuclear cyanido-bridged complexes by regulating the electron donating ability of CCN-terminal fragments
Source: Royal Society of Chemistry journal article supplement (doi:10.1039/d3dt04226j), 2024-01-01
Supplement: d3dt04226j1.pdf [file d3dt04226j1.pdf]

## Supplementary Information

### **Fine-Tuning of Thermally Induced SCO Behaviors of Trinuclear Cyanido-Bridged Complexes by Regulating the Electron Donating Ability of C<sub>CN</sub>-Terminal Fragment**

Ying-Ying Huang,<sup>a, b</sup> Yong He,<sup>a, b</sup> Yang Liu,<sup>a, b</sup> Jin-Hui Fu,<sup>a, b</sup> Xiao-lin Liu,<sup>a, b</sup> Xin-Tao Wu<sup>a</sup> and Tian-Lu Sheng<sup>\*a</sup>

*a State Key Laboratory of Structural Chemistry, Fujian Institute of Research on the Structure of Matter, Chinese Academy of Sciences, Fuzhou 350002, China.*

*E-mail: [tsheng@fjirsm.ac.cn](mailto:tsheng@fjirsm.ac.cn)*

*b School of Chemical Sciences, University of Chinese Academy of Sciences, Beijing, 100049, China.*

## Table of contents

|                                                 |          |
|-------------------------------------------------|----------|
| <b>Results and Discussion .....</b>             | <b>1</b> |
| Thermo-gravimetric curve of complexes .....     | 1        |
| Crystallographic data .....                     | 2        |
| Thermal ellipsoid figure of complexes .....     | 4        |
| Crystal packing figure of the complexes .....   | 7        |
| Powder X-ray diffraction of the complexes ..... | 9        |

## Results and Discussion

### Thermo-gravimetric curve of complexes

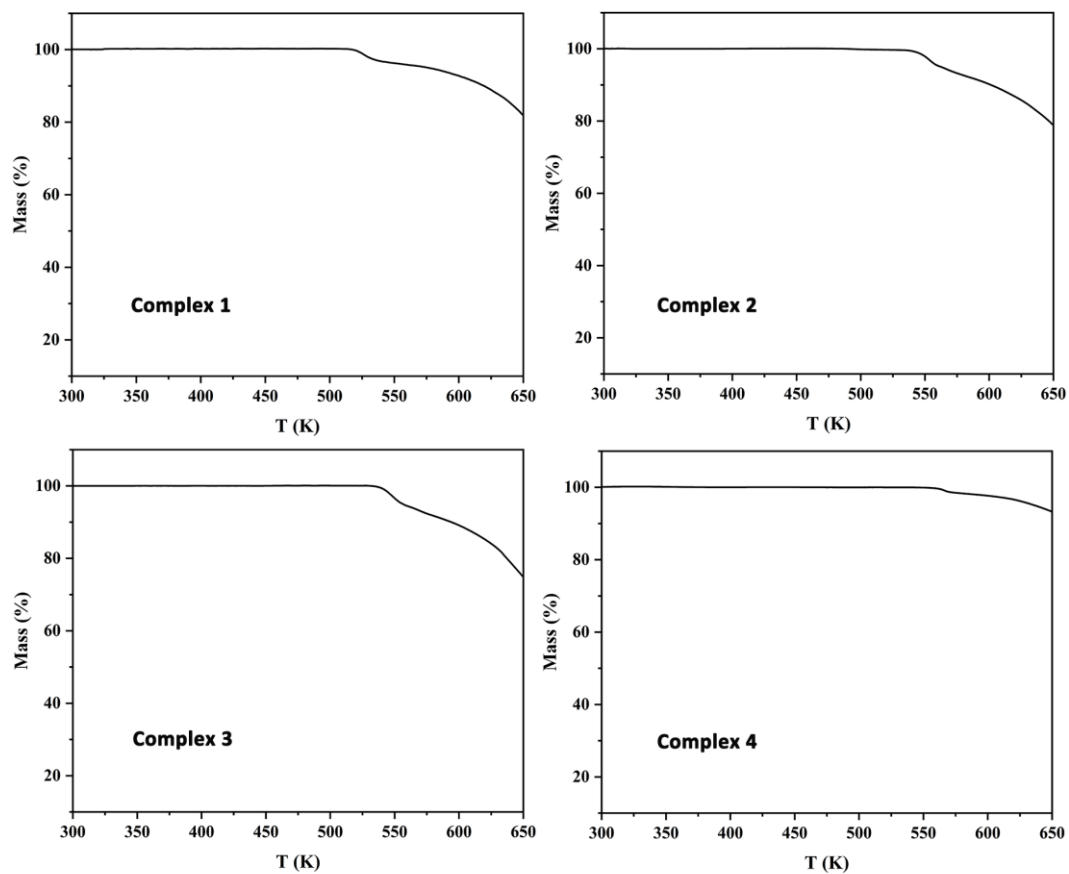

Fig. S1 Thermo-gravimetric curve of 1-4 in flowing nitrogen atmosphere.

## Crystallographic data

**Table S1** Crystallographic data of **0**, **1** and **2** at 293 K

|                                    | <b>0</b>                                                                                       | <b>1</b>                                                                                                                    | <b>2</b>                                                                                                                    |
|------------------------------------|------------------------------------------------------------------------------------------------|-----------------------------------------------------------------------------------------------------------------------------|-----------------------------------------------------------------------------------------------------------------------------|
| Empirical formula                  | C <sub>28</sub> H <sub>28</sub> F <sub>6</sub> FeN <sub>12</sub> O <sub>8</sub> S <sub>2</sub> | C <sub>92</sub> H <sub>82</sub> F <sub>6</sub> Fe <sub>3</sub> N <sub>14</sub> O <sub>6</sub> P <sub>4</sub> S <sub>2</sub> | C <sub>98</sub> H <sub>94</sub> F <sub>6</sub> Fe <sub>3</sub> N <sub>14</sub> O <sub>6</sub> P <sub>4</sub> S <sub>2</sub> |
| Color and Habit                    | Faint yellow block                                                                             | Black-red block                                                                                                             | Dark red block                                                                                                              |
| Crystal Size (mm)                  | 0.425'0.353'0.272                                                                              | 0.417'0.335'0.237                                                                                                           | 0.385'0.327'0.216                                                                                                           |
| Temperature(K)                     | 293                                                                                            | 293                                                                                                                         | 293                                                                                                                         |
| Crystal system                     | Triclinic                                                                                      | monoclinic                                                                                                                  | monoclinic                                                                                                                  |
| Space group                        | <i>P</i> -1                                                                                    | <i>P</i> 2 <sub>1</sub> / <i>n</i>                                                                                          | <i>P</i> 2 <sub>1</sub> / <i>n</i>                                                                                          |
| a (Å)                              | 10.898(2)                                                                                      | 12.8808(3)                                                                                                                  | 12.2516(2)                                                                                                                  |
| b (Å)                              | 11.798(3)                                                                                      | 20.5335(5)                                                                                                                  | 20.5089(3)                                                                                                                  |
| c (Å)                              | 15.055(4)                                                                                      | 17.2688(4)                                                                                                                  | 19.4786(3)                                                                                                                  |
| alpha (deg.)                       | 87.208(7)                                                                                      | 90                                                                                                                          | 90                                                                                                                          |
| beta (deg.)                        | 75.799(5)                                                                                      | 97.894(2)                                                                                                                   | 101.0760(10)                                                                                                                |
| gamma (deg.)                       | 78.617(7)                                                                                      | 90                                                                                                                          | 90                                                                                                                          |
| Volume (Å <sup>3</sup> )           | 1839.6(7)                                                                                      | 4524.11(19)                                                                                                                 | 4803.16(13)                                                                                                                 |
| Z                                  | 2                                                                                              | 2                                                                                                                           | 2                                                                                                                           |
| Formula weight                     | 894.59                                                                                         | 1949.26                                                                                                                     | 2033.42                                                                                                                     |
| Density(cal.)(g·cm <sup>-3</sup> ) | 1.615                                                                                          | 1.431                                                                                                                       | 1.406                                                                                                                       |
| μ(mm <sup>-1</sup> )               | 0.619                                                                                          | 3.762                                                                                                                       | 3.558                                                                                                                       |
| F(000)                             | 912.0                                                                                          | 2008.0                                                                                                                      | 2104.0                                                                                                                      |
| Theta range (deg.)                 | 2.79 to 52.744                                                                                 | 5.846 to 109.642                                                                                                            | 5.494 to 109.642                                                                                                            |
| Reflections collected              | 19461                                                                                          | 33051                                                                                                                       | 41673                                                                                                                       |
| Independent reflections            | 7432 [R <sub>int</sub> = 0.0472]                                                               | 8573 [R <sub>int</sub> = 0.0929]                                                                                            | 9106 [R <sub>int</sub> = 0.0288]                                                                                            |
| Index range                        | -13 ≤ h ≤ 13,<br>-14 ≤ k ≤ 14,<br>-18 ≤ l ≤ 18                                                 | -14 ≤ h ≤ 15,<br>-19 ≤ k ≤ 25,<br>-21 ≤ l ≤ 21                                                                              | -14 ≤ h ≤ 11,<br>-24 ≤ k ≤ 25,<br>-23 ≤ l ≤ 23                                                                              |
| Data/restraints/parameters         | 7432/7/527                                                                                     | 8573/13/575                                                                                                                 | 9106/2/605                                                                                                                  |
| Final R indexes [I>=2σ (I)]        | R <sub>1</sub> = 0.0709,<br>wR <sub>2</sub> = 0.1807                                           | R <sub>1</sub> = 0.0869,<br>wR <sub>2</sub> = 0.2035                                                                        | R <sub>1</sub> = 0.0444,<br>wR <sub>2</sub> = 0.1210                                                                        |
| Final R indexes [all data]         | R <sub>1</sub> = 0.0900,<br>wR <sub>2</sub> = 0.2105                                           | R <sub>1</sub> = 0.1303,<br>wR <sub>2</sub> = 0.2251                                                                        | R <sub>1</sub> = 0.0532,<br>wR <sub>2</sub> = 0.1268                                                                        |
| Goodness-of-fit                    | 1.041                                                                                          | 1.038                                                                                                                       | 0.987                                                                                                                       |

$$R_1 = \sum(|F_o| - |F_c|) / \sum|F_o|; wR_2 = [\sum w(|F_o|^2 - |F_c|^2)^2 / \sum w|F_o|^2]^{1/2}$$

**Table S2** Crystallographic data of **3** for 100 K and 293 K and **4** for 293 K

|                                    | <b>3 (100 K)</b>                                                                                                             | <b>3(293 K)</b>                                                                                                              | <b>4</b>                                                                                                                       |
|------------------------------------|------------------------------------------------------------------------------------------------------------------------------|------------------------------------------------------------------------------------------------------------------------------|--------------------------------------------------------------------------------------------------------------------------------|
| Empirical formula                  | C <sub>100</sub> H <sub>98</sub> F <sub>6</sub> Fe <sub>3</sub> N <sub>14</sub> O <sub>6</sub> P <sub>4</sub> S <sub>2</sub> | C <sub>100</sub> H <sub>98</sub> F <sub>6</sub> Fe <sub>3</sub> N <sub>14</sub> O <sub>6</sub> P <sub>4</sub> S <sub>2</sub> | C <sub>100</sub> H <sub>98</sub> F <sub>6</sub> FeN <sub>14</sub> O <sub>6</sub> P <sub>4</sub> Ru <sub>2</sub> S <sub>2</sub> |
| Color and Habit                    | Dark red block                                                                                                               | Red block                                                                                                                    | Dark red block                                                                                                                 |
| Crystal Size (mm)                  | 0.328'0.275'0.213                                                                                                            | 0.315'0.246'0.202                                                                                                            | 0.426'0.342'0.304                                                                                                              |
| Temperature(K)                     | 100                                                                                                                          | 293                                                                                                                          | 293                                                                                                                            |
| Crystal system                     | Triclinic                                                                                                                    | Triclinic                                                                                                                    | Triclinic                                                                                                                      |
| Space group                        | <i>P</i> -1                                                                                                                  | <i>P</i> -1                                                                                                                  | <i>P</i> -1                                                                                                                    |
| a (Å)                              | 11.8086(2)                                                                                                                   | 12.00670(10)                                                                                                                 | 12.1314(2))                                                                                                                    |
| b (Å)                              | 14.1394(3)                                                                                                                   | 14.40640(10)                                                                                                                 | 14.6758(3)                                                                                                                     |
| c (Å)                              | 15.5340(4)                                                                                                                   | 15.52430(10)                                                                                                                 | 15.4174(3)                                                                                                                     |
| alpha (deg.)                       | 70.707(2)                                                                                                                    | 71.0090(10)                                                                                                                  | 71.000(2)                                                                                                                      |
| beta (deg.)                        | 84.123(2)                                                                                                                    | 84.4960(10)                                                                                                                  | 83.364(2))                                                                                                                     |
| gamma (deg.)                       | 81.194(2)                                                                                                                    | 81.4470(10)                                                                                                                  | 79.993(2)                                                                                                                      |
| Volume (Å <sup>3</sup> )           | 2415.41(10)                                                                                                                  | 2507.65(4)                                                                                                                   | 2550.72(9)                                                                                                                     |
| Z                                  | 1                                                                                                                            | 1                                                                                                                            | 1                                                                                                                              |
| Formula weight                     | 2061.47                                                                                                                      | 2061.47                                                                                                                      | 2151.91                                                                                                                        |
| Density(cal.)(g·cm <sup>-3</sup> ) | 1.417                                                                                                                        | 1.365                                                                                                                        | 1.401                                                                                                                          |
| μ(mm <sup>-1</sup> )               | 0.628                                                                                                                        | 3.412                                                                                                                        | 3.403                                                                                                                          |
| F(000)                             | 1068.0                                                                                                                       | 1068.0                                                                                                                       | 1104.0                                                                                                                         |
| Theta range (deg.)                 | 4.346 to 61.006                                                                                                              | 5.684 to 109.64                                                                                                              | 5.596 to 109.644                                                                                                               |
| Reflections collected              | 41959                                                                                                                        | 31325                                                                                                                        | 28796                                                                                                                          |
| Independent reflections            | 13808 [R <sub>int</sub> = 0.0321]                                                                                            | 9481 [R <sub>int</sub> = 0.0270]                                                                                             | 9569 [R <sub>int</sub> = 0.0298]                                                                                               |
| Index range                        | -16 ≤ h ≤ 15,<br>-20 ≤ k ≤ 20,<br>-17 ≤ l ≤ 21                                                                               | -14 ≤ h ≤ 14,<br>-16 ≤ k ≤ 17,<br>-18 ≤ l ≤ 16                                                                               | -14 ≤ h ≤ 14,<br>-17 ≤ k ≤ 17,<br>-18 ≤ l ≤ 17                                                                                 |
| Data/restraints/parameters         | 13808/124/687                                                                                                                | 9481/8/615                                                                                                                   | 9569/16/615                                                                                                                    |
| Final R indexes [I>=2σ(I)]         | R <sub>1</sub> = 0.0422,<br>wR <sub>2</sub> = 0.1092                                                                         | R <sub>1</sub> = 0.0540,<br>wR <sub>2</sub> = 0.1508                                                                         | R <sub>1</sub> = 0.0450,<br>wR <sub>2</sub> = 0.1332                                                                           |
| Final R indexes [all data]         | R <sub>1</sub> = 0.0597,<br>wR <sub>2</sub> = 0.1179                                                                         | R <sub>1</sub> = 0.0604,<br>wR <sub>2</sub> = 0.1549                                                                         | R <sub>1</sub> = 0.0515,<br>wR <sub>2</sub> = 0.1384                                                                           |
| Goodness-of-fit                    | 0.997                                                                                                                        | 1.043                                                                                                                        | 1.001                                                                                                                          |

$$R_1 = \sum(|F_o| - |F_c|) / \sum|F_o|; wR_2 = [\sum w(|F_o|^2 - |F_c|^2)^2 / \sum w|F_o|^2]^{1/2}$$

## Thermal ellipsoid figure of complexes

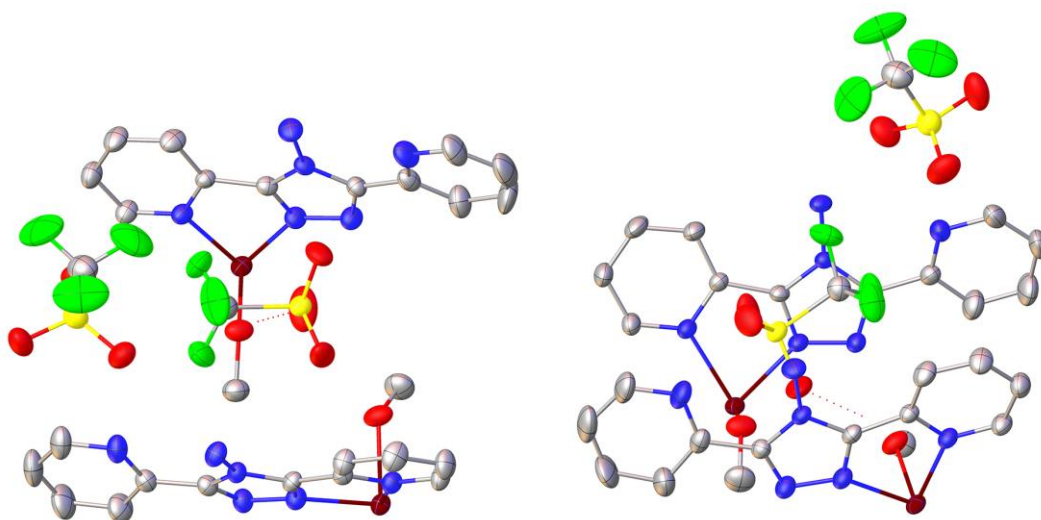

**Fig. S2** Thermal ellipsoid figure of **0** at 293 K. Hydrogen atoms have been omitted for clarity. Reddish brown, Fe; pink, P; green, F; faint yellow; S; red, O; gray, C; dark blue, N.

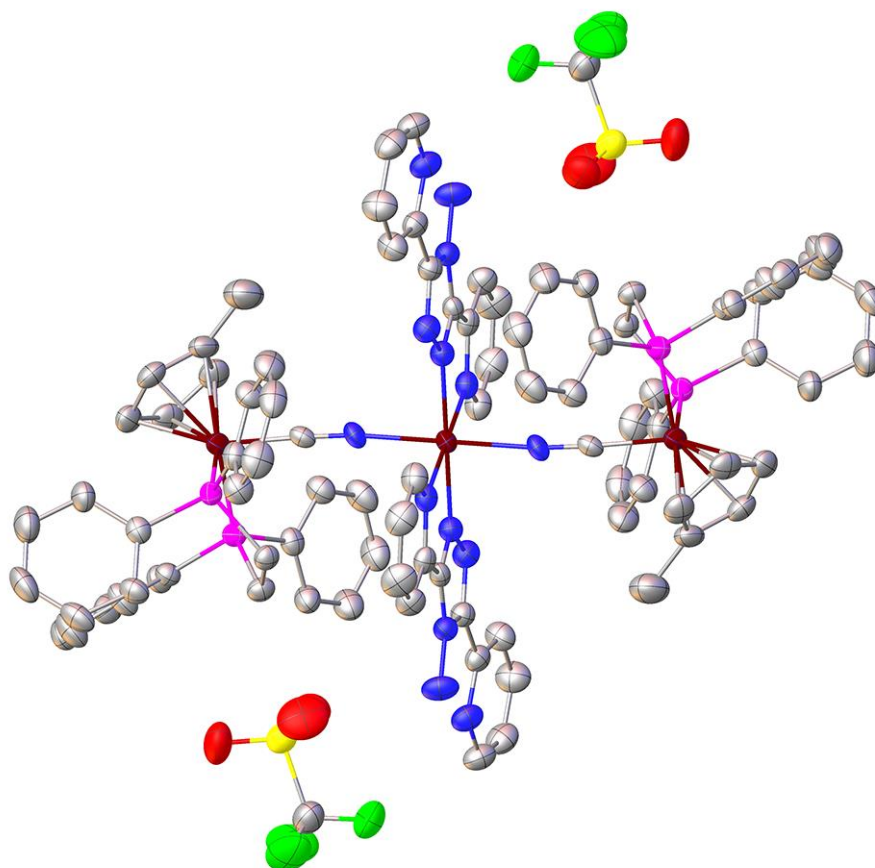

**Fig. S3** Thermal ellipsoid figure of **1** at 293 K. Hydrogen atoms have been omitted for clarity. Reddish brown, Fe; Tiffany blue, Ru; pink, P; green, F; faint yellow; S; red, O; gray, C; dark blue, N.

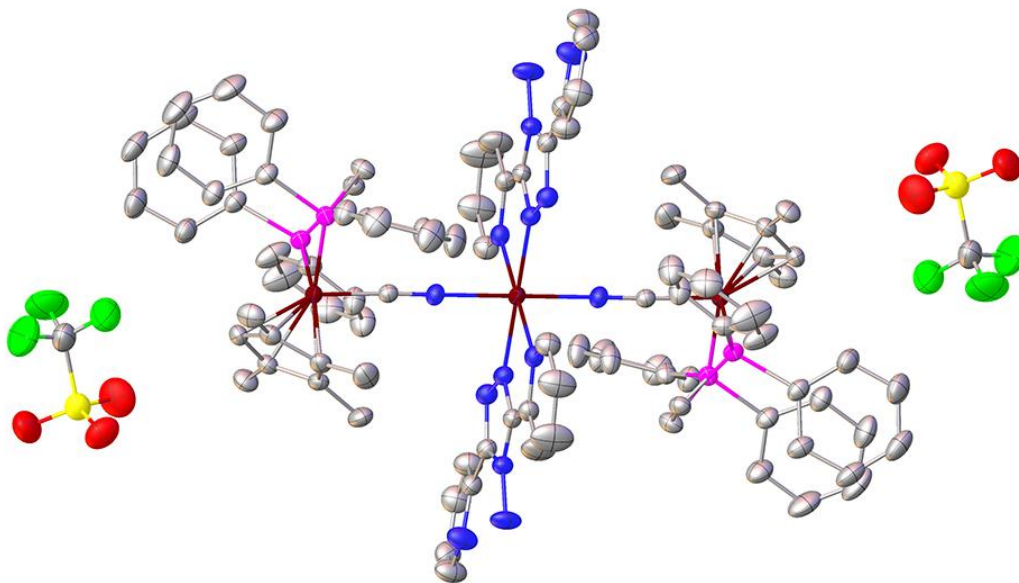

**Fig. S4** Thermal ellipsoid figure of **2** at 293 K. Hydrogen atoms have been omitted for clarity. Reddish brown, Fe; pink, P; green, F; faint yellow, S; red, O; gray, C; dark blue, N.

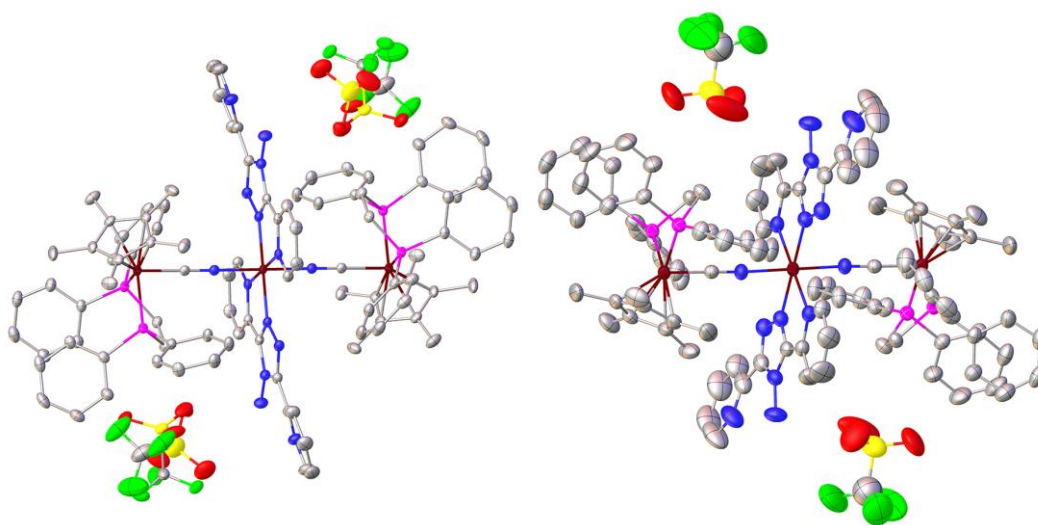

**Fig. S5** Thermal ellipsoid figure of **3** at 100 K and 293 K. Hydrogen atoms have been omitted for clarity. Reddish brown, Fe; pink, P; green, F; faint yellow, S; red, O; gray, C; dark blue, N.

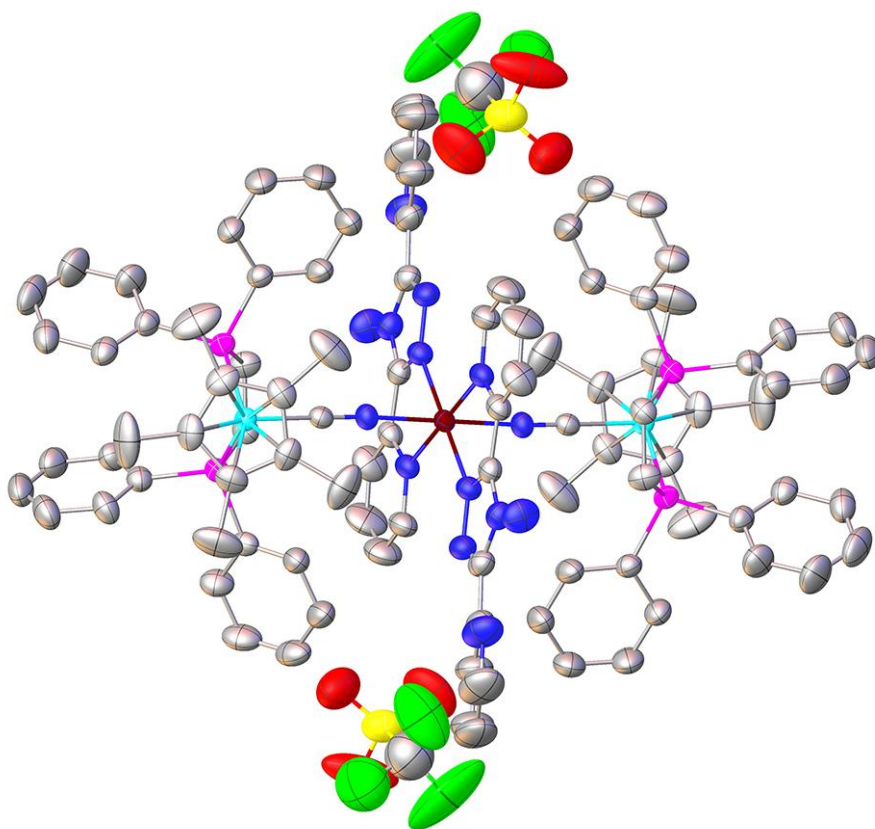

**Fig. S6** Thermal ellipsoid figure of **4** at 100 K and 293 K. Hydrogen atoms have been omitted for clarity. Reddish brown, Fe; pink, P; green, F; faint yellow; S; red, O; gray, C; dark blue, N.



## Crystal packing figure of the complexes

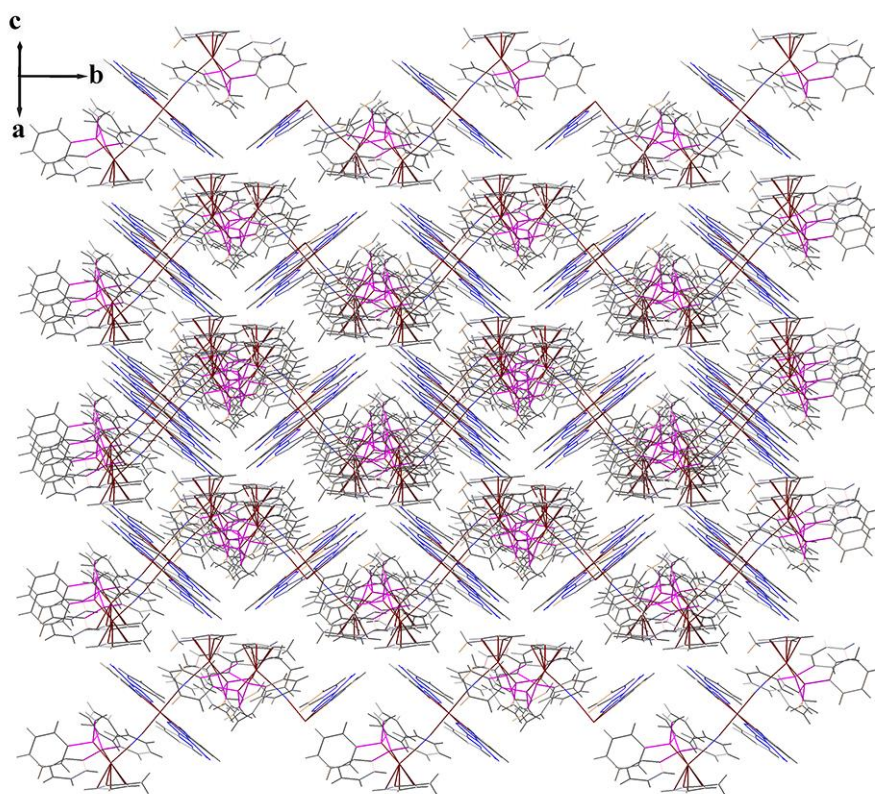

Fig. S7 Molecular packing figure of **1** at 293 K, and  $\text{CF}_3\text{SO}_3^-$  anions have been removed for clarity.

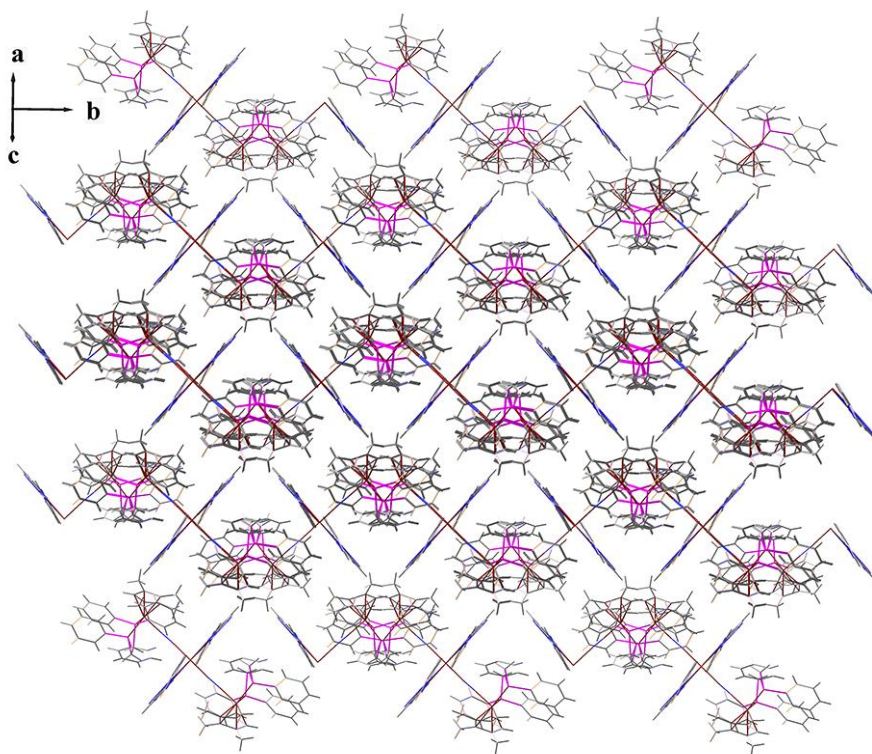

Fig. S8 Molecular packing figure of **2** at 293 K, and  $\text{CF}_3\text{SO}_3^-$  anions have been removed for clarity.

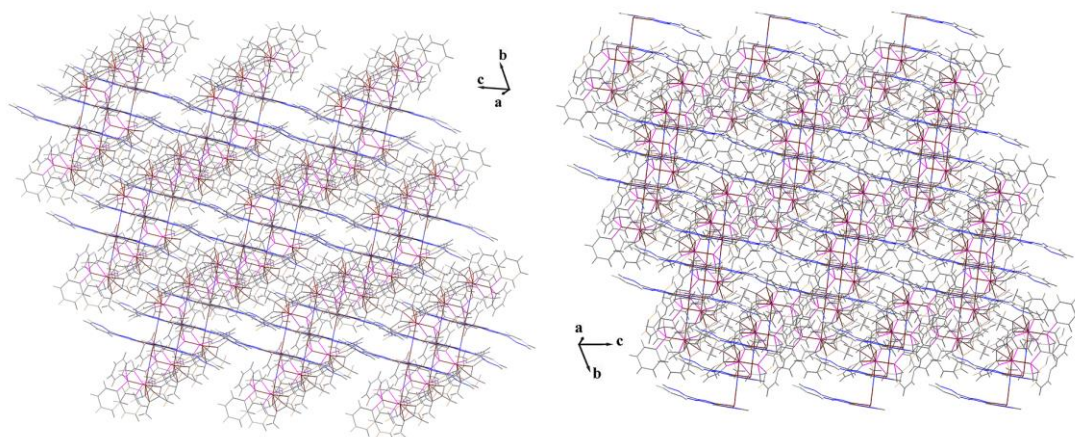

**Fig. S9** Molecular packing figure of **3** at 100 K (left) and 293 K (right), and  $\text{CF}_3\text{SO}_3^-$  anions have been removed for clarity.

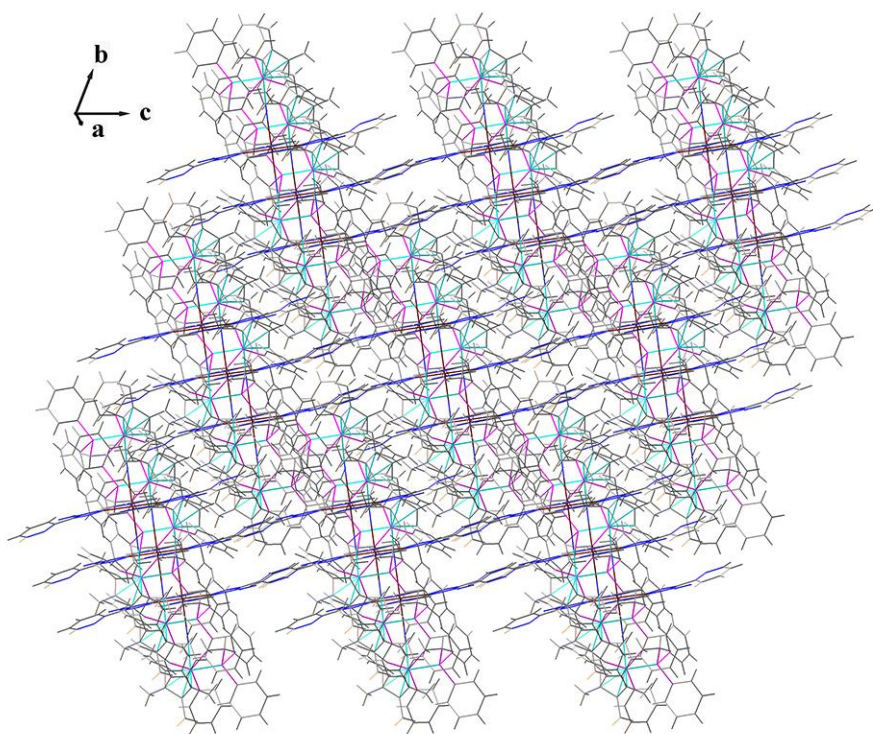

**Fig. S10** Molecular packing figure of **4** at 293 K, and  $\text{CF}_3\text{SO}_3^-$  anions have been removed for clarity.

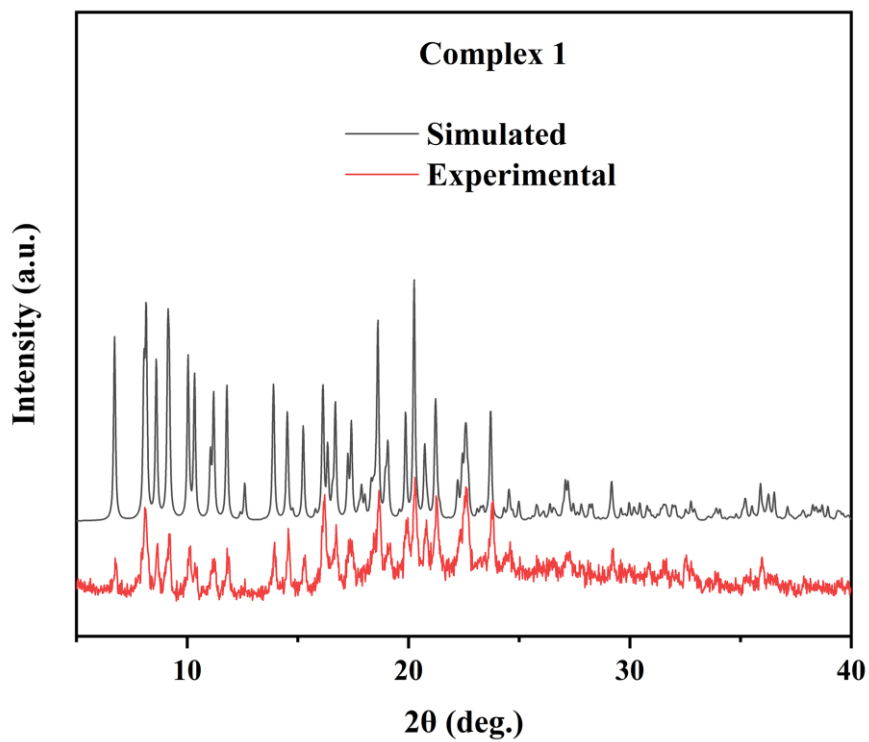

Fig. S11. Powder X-ray diffraction of 1.

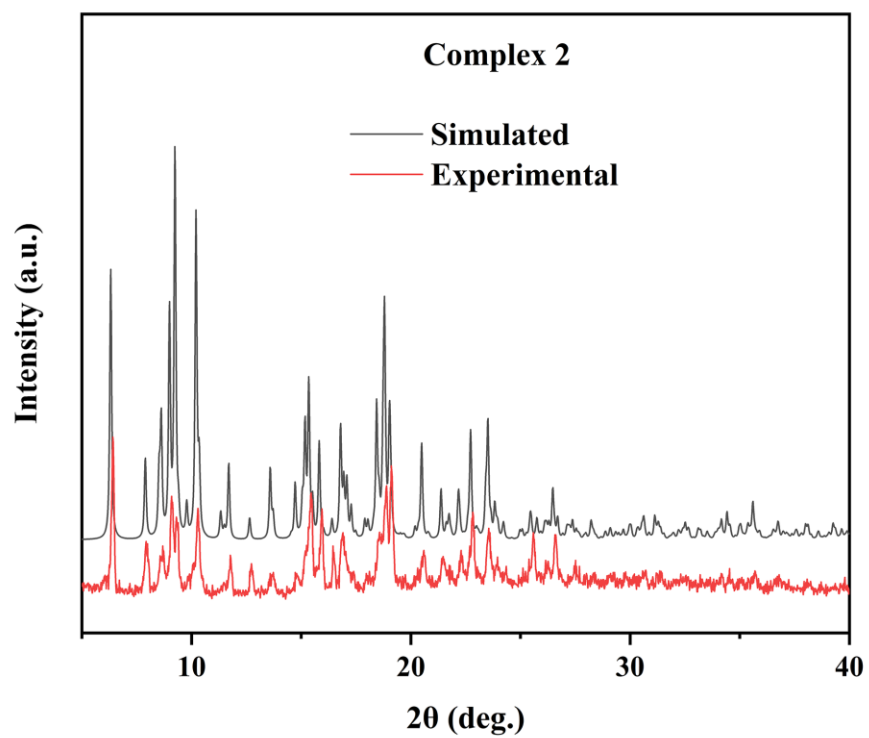

Fig. S12. Powder X-ray diffraction of 2.



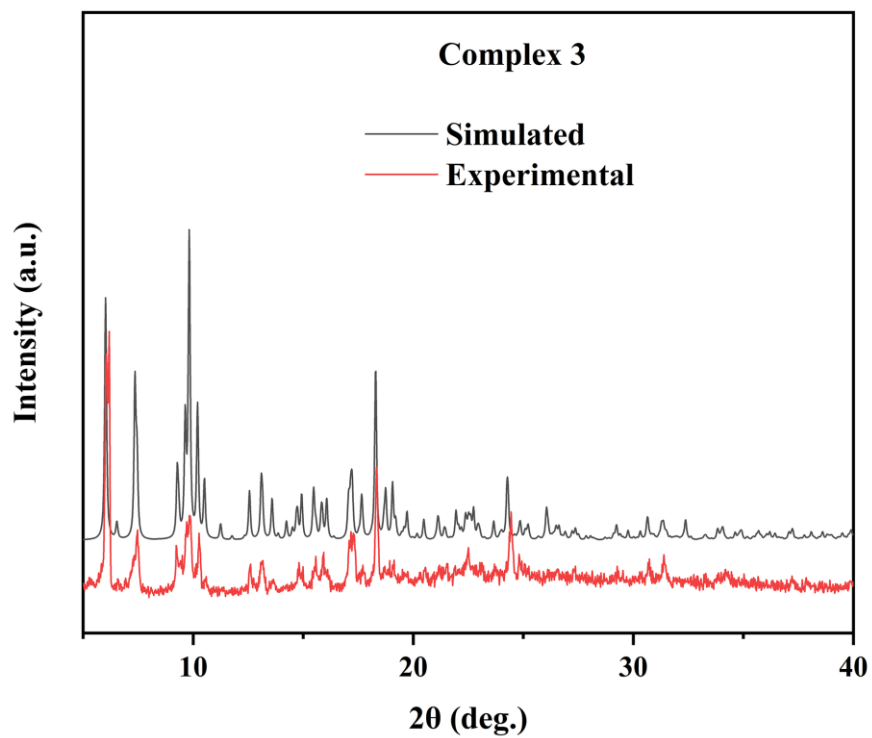

Fig. S13. Powder X-ray diffraction of 3.

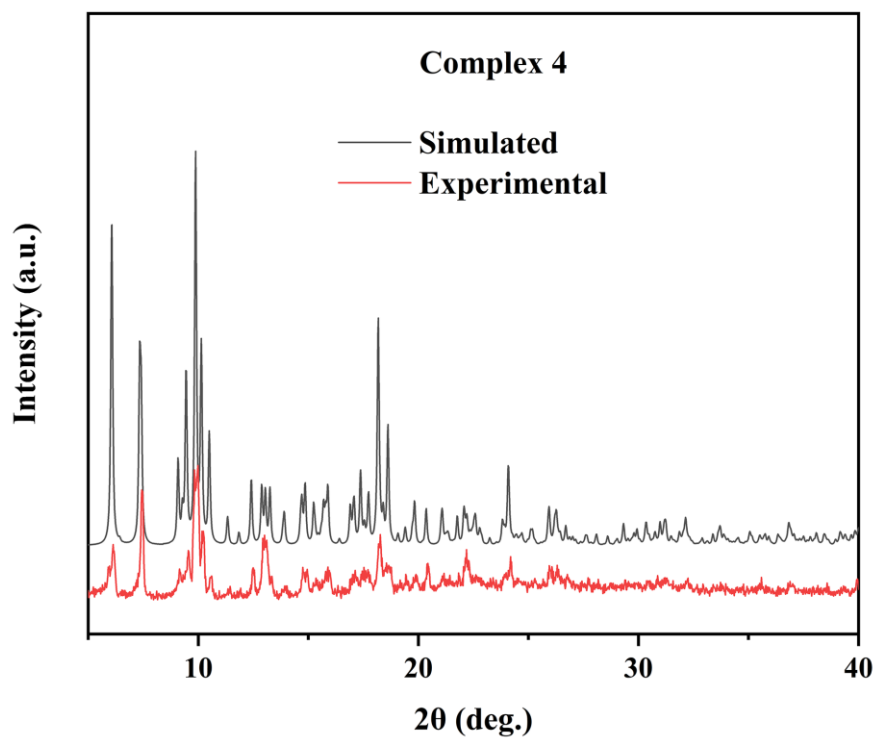

Fig. S14. Powder X-ray diffraction of 4.
